# Supplementary material for: Impact of HO 2 aerosol uptake on radical levels and O 3 production during summertime in Beijing
Source: Copernicus journal article supplement (doi:10.5194/acp-2022-800), 2022-12-14
Supplement: Supplementary file [file acp-2022-800-AC1-supplement.pdf]

# Impact of HO<sub>2</sub> aerosol uptake on radical levels and O<sub>3</sub> production during summertime in Beijing

Dyson et al.

## Reply to Anonymous referee #1

We thank the referee for their comments, addressed individually below. The referee's comments are given in normal type with our response in italics. Changes to the manuscript are then given in red type.

1. It is unclear why the authors examine the HO<sub>2</sub> loss pathways not the HO<sub>x</sub> loss pathways. In Figure 8 and Tables 4&5, HO<sub>2</sub>+NO is only a radical propagation channel, and does not lead to loss of radicals. So is HO<sub>2</sub>+O<sub>3</sub>. HO<sub>2</sub>+NO is the fast cycling between OH and HO<sub>2</sub>, and of course they are much faster than other pathways in Figure 8. It seems that the authors should compare radical sinks (peroxide, nitrogen and aerosol uptake) as they did in Section 3.3.3 for O<sub>3</sub> sensitivity, as it makes little sense to compare radical propagation channels to radical sink channels.

*We chose to look at loss pathways specifically, to better understand the effect of HO<sub>2</sub> uptake on HO<sub>2</sub> concentrations, as is the focus of this study. There was not a large change in absolute HO<sub>2</sub> concentration when uptake was included in the model because the uptake channel is not competitive with the propagation reaction, as shown in Figure 7.*

2. The aerosol uptake of HO<sub>2</sub>. It is unclear why the authors only focus on copper here. In previous studies, it was clear that Cu, Fe and potentially other metals can all contribute to HO<sub>2</sub> aerosol uptake, which could make the gamma a lot higher. Was Fe measured in this study? If so, it should be mentioned in Tables 2 and 3. The parameterization used in this study in Equation (1) only includes copper, but it does not necessarily reflect what is happening in the atmosphere. The choices of Equation (1) and fixed value (0.2) seems inadequate to address the role of HO<sub>2</sub> aerosol uptake. Given the dataset the authors provided, it would be useful if the authors can provide some observational evidence on gamma(HO<sub>2</sub>), maybe a plot of obs/mod HO<sub>2</sub> as a function of aerosol surface area?

*As stated by the referee the parameterisation introduced by Song et al., (2021) only includes copper. As such, while aerosol soluble Fe (II) concentration measurements are available for the AIRPRO Summer campaign, and Fe (II) is known to catalyse HO<sub>2</sub> loss within the aerosol (Mao et al., 2013), typical values are not included in Tables 2 or 3 as we wished to focus on terms in the Song parameterisation. To our knowledge there is no current parameterisation of the effect of Fe (II) concentrations on the uptake of HO<sub>2</sub>.*

*A plot of measured/modelled HO<sub>2</sub> as a function of measured aerosol surface area for both MCM\_SA and MCM\_gamma has been added to the manuscript as SI Figure 4.*

*Given that the parameterisation isn't giving a significant uptake value with just Copper, values ranging from 0.002 to 0.15, we would not expect the addition of Fe to have a large additional effect averaged over the entire campaign.*

*Mao, J., Fan, S., Jacob, D.J. and Travis, K.R., 2013. Radical loss in the atmosphere from Cu-Fe redox coupling in aerosols. Atmospheric Chemistry and Physics, 13(2), pp.509-519.*

3. In Figure 2, was the surface area for dry aerosols or wet aerosols? If it was for dry aerosols, the surface area should be corrected for hygroscopic growth and please provide details.

*The SMPS was run without a dryer, and as such, the aerosol surface area quoted is representative of the real ambient size distribution. We have revised the manuscript to make this clearer:*

*Ln 369: "Online particle sizers were run without a drying inlet to ensure aerosol measurements were as close to real ambient size distributions as possible, and therefore correction for hygroscopic growth was not necessary."*

4. It seems that RO<sub>2</sub> uptake was discussed in Section 3.3.3, but RO<sub>2</sub> uptake was never mentioned in Section 3.3.1 and Section 3.3.2.

*To our knowledge there are no current lab measurements of RO<sub>2</sub> uptake. Uptake of isoprene-RO<sub>2</sub> onto ambient aerosols have been measured in Japan (Li et al., 2020). Whilst this could be an important loss of RO<sub>2</sub> especially in polluted regions, and for multifunctional RO<sub>2</sub> species, there is an uncertainty around this because of that.*

*Li, J., Kohno, N., Sakamoto, Y., Pham, H.G., Murano, K., Sato, K., Nakayama, T. and Kajii, Y., 2022. Potential factors contributing to ozone production in AQUAS–Kyoto campaign in summer 2020: Natural source-related missing OH reactivity and heterogeneous HO<sub>2</sub>/RO<sub>2</sub> loss. Environmental Science & Technology, 56(18), pp.12926-12936.*

5. Figures 7 and 9 seem redundant

*We have revised the manuscript to move Figures 7 and 9 to the SI.*

6. L305: Henry's law constant for HO<sub>2</sub> is temperature-dependent. Is that taken into account here?

*Yes. Henry's law constant was calculated using the average daily temperature measured at the site during the campaign.*

7. Line 570-615 is largely from Sakamoto et al. paper.

*We chose to include this section, while referencing Sakamoto et al, for clarity. We have reduced this section with respect to the original reference.*
