# Supplementary material for: Impact of HO 2 aerosol uptake on radical levels and O 3 production during summertime in Beijing
Source: Copernicus journal article supplement (doi:10.5194/acp-2022-800), 2022-12-14
Supplement: Supplementary file [file acp-2022-800-AC2-supplement.pdf]

# Impact of HO<sub>2</sub> aerosol uptake on radical levels and O<sub>3</sub> production during summertime in Beijing

Dyson et al.

## Reply to Anonymous referee #2

We thank the referee for their comments, addressed individually below. The referee's comments are given in normal type with our response in italics. Changes to the manuscript are then given in red type.

1. Since the measured and modeled OH, HO<sub>2</sub>, and RO<sub>2</sub> concentrations have been discussed in detail in Whalley et al., 2021, the authors should focus this paper on the impact of HO<sub>2</sub> uptake on the modeled concentrations. In that light, I would recommend removing Section 2.2 and referencing the Whalley et al., 2021 ACP paper (and updating the reference to the discussion paper).

*We have revised the manuscript to move Section 2.2 to the SI.*

2. I would also suggest moving the description of the LN/Q and absolute O<sub>3</sub> sensitivity calculation (lines 570-603) to section 2 after the model description, and instead focusing on the results in Section 3.

*We have revised the manuscript, moving the description of LN/Q and O<sub>3</sub> sensitivity to section 2.*

3. The authors provide a brief description regarding potential reasons for the discrepancy between the modeled radical concentrations with the measurements, which are discussed in detail in Whalley et al. (2021). However, at first read the description here does not appear to be consistent with the description in Whalley et al. For example, line 462 states that the overprediction of HO<sub>2</sub> by the model may be due to “an under-prediction in the rate of reaction of RO<sub>2</sub> with NO to produce a different RO<sub>2</sub> species...” while the conclusion in Whalley et al. 2021 is that the “propagation rate of RO<sub>2</sub> to HO<sub>2</sub> may be substantially slower than assumed.” While I believe the reasoning is consistent between the two papers, the wording here could be clarified to remove any potential confusion.

*We agree with the referee and for clarity have revised line 460 onwards in the manuscript to read:*

*“the over-prediction of HO<sub>2</sub> could be due, in part, to the propagation rate of RO<sub>2</sub> to HO<sub>2</sub> being significantly slower than currently included in the model. This could be due to a lack of understanding of the rate of reaction of RO<sub>2</sub> with NO to produce different RO<sub>2</sub> species, i.e. RO<sub>2</sub> + NO → RO<sub>2</sub>’, which would lead to propagation of RO<sub>2</sub> to different, more oxidised RO<sub>2</sub> species, competing with the recycling of RO<sub>2</sub> via RO<sub>2</sub> to give HO<sub>2</sub>. It is also possible, that the overestimation in the propagation rate of RO<sub>2</sub> to HO<sub>2</sub> could be due to a lack of RO<sub>2</sub> autoxidation pathways included within the model which could lead to the formation of highly oxygenated molecules as opposed to HO<sub>2</sub>. The higher, measured RO<sub>2</sub> concentrations could, therefore, suggest that the lifetime of total RO<sub>2</sub> is longer than currently considered within the model.”*

4. Similar to that described in Sakamoto et al. (2019), the authors include uptake of RO<sub>2</sub> radicals into account when analyzing the impact of aerosol uptake on ozone production sensitivity. Given the authors suggestion that the overprediction of HO<sub>2</sub> and underprediction of RO<sub>2</sub> is due to isomerization of complex RO<sub>2</sub> or RO radicals that effectively increases the lifetime of RO<sub>2</sub> radicals and slows the propagation of RO<sub>2</sub> to HO<sub>2</sub>, can the authors comment on whether uptake of RO<sub>2</sub> radicals in this scenario could impact the concentration of RO<sub>2</sub> radicals and the rate of ozone production? What effective lifetime of RO<sub>2</sub> radicals would heterogeneous uptake be competitive and impact RO<sub>2</sub> concentrations? Perhaps include a plot similar to Figure 8 for RO<sub>2</sub> loss to address this?

*We would expect that if the uptake of RO<sub>2</sub> to aerosol is significant, then the concentration of RO<sub>2</sub> radicals within the model would decrease, in turn decreasing the HO<sub>2</sub> concentration due to an increase in RO<sub>2</sub> radical sinks. This would slow the propagation of RO<sub>2</sub> to HO<sub>2</sub>, and therefore decrease the HO<sub>2</sub> radical overprediction within the model if this process is included. Looking at Table 4 in this work, at maximum 7.3 % of total loss of HO<sub>2</sub> in MCM\_gamma is via uptake. Li et al., (2020) measured ambient uptake of isoprene-RO<sub>2</sub> and gave the mean loss of HO<sub>2</sub> onto aerosols as 0.0014 s<sup>-1</sup>, just under double the loss rate of RO<sub>2</sub> onto aerosols, at 0.0008 s<sup>-1</sup>. Looking at Figure 3 in Whalley et al., (2021), a full comparison of median production and destruction rates for OH, HO<sub>2</sub>, total RO<sub>2</sub> and RO<sub>x</sub> for the Beijing Summer campaign is given, showing the gas phase loss of RO<sub>2</sub> to be much higher than HO<sub>2</sub>. This, coupled with the lower loss rate of RO<sub>2</sub> measured by Li et al., (2020), suggests the RO<sub>2</sub> uptake would not be significant to impact RO<sub>2</sub> concentrations for this campaign.*

*Li, J., Kohno, N., Sakamoto, Y., Pham, H.G., Murano, K., Sato, K., Nakayama, T. and Kajii, Y., 2022. Potential factors contributing to ozone production in AQUAS–Kyoto campaign in summer 2020: Natural source-related missing OH reactivity and heterogeneous HO<sub>2</sub>/RO<sub>2</sub> loss. Environmental Science & Technology, 56(18), pp.12926-12936.*

*Whalley, L.K., Slater, E.J., Woodward-Massey, R., Ye, C., Lee, J.D., Squires, F., Hopkins, J.R., Dunmore, R.E., Shaw, M., Hamilton, J.F. and Lewis, A.C., 2021. Evaluating the sensitivity of radical chemistry and ozone formation to ambient VOCs and NO<sub>x</sub> in Beijing. Atmospheric Chemistry and Physics, 21(3), pp.2125-2147.*
